# Supplementary material for: A quinazoline-based HDAC inhibitor affects gene expression pathways involved in cholesterol biosynthesis and mevalonate in prostate cancer cells
Source: Royal Society of Chemistry journal article supplement (doi:10.1039/c5mb00554j), 2016-01-06
Supplement: c5mb00554j1.pdf [file c5mb00554j1.pdf]

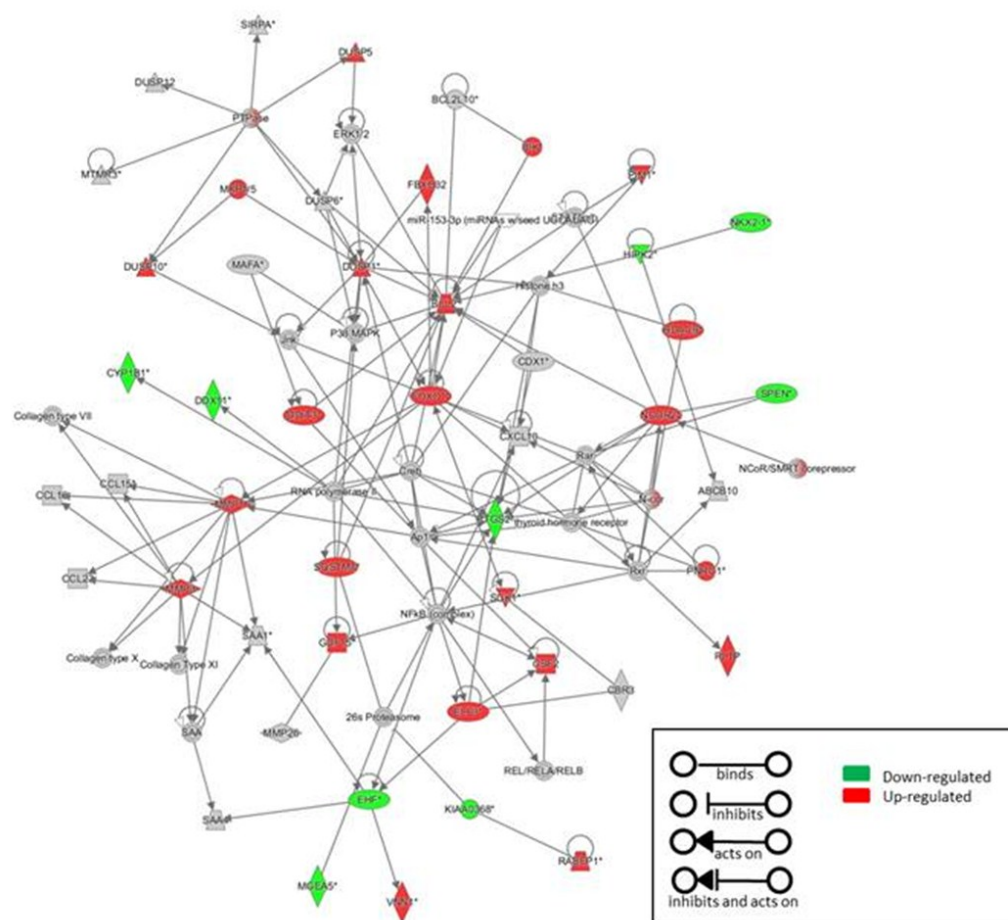

**Supplementary Figure 1.** A biological network of genes related to cancer following the treatment of PC3 cells with SN30028 (4-hour). The network was generated using the Ingenuity Pathway Analysis software. Genes represented by a red node were up-regulated and those represented by a green node were down-regulated. Increasing colour intensity represents increasing differential gene expression. The nodes with an asterisk at the right of the name of the gene indicate that the gene is represented by more than one probe in the array.

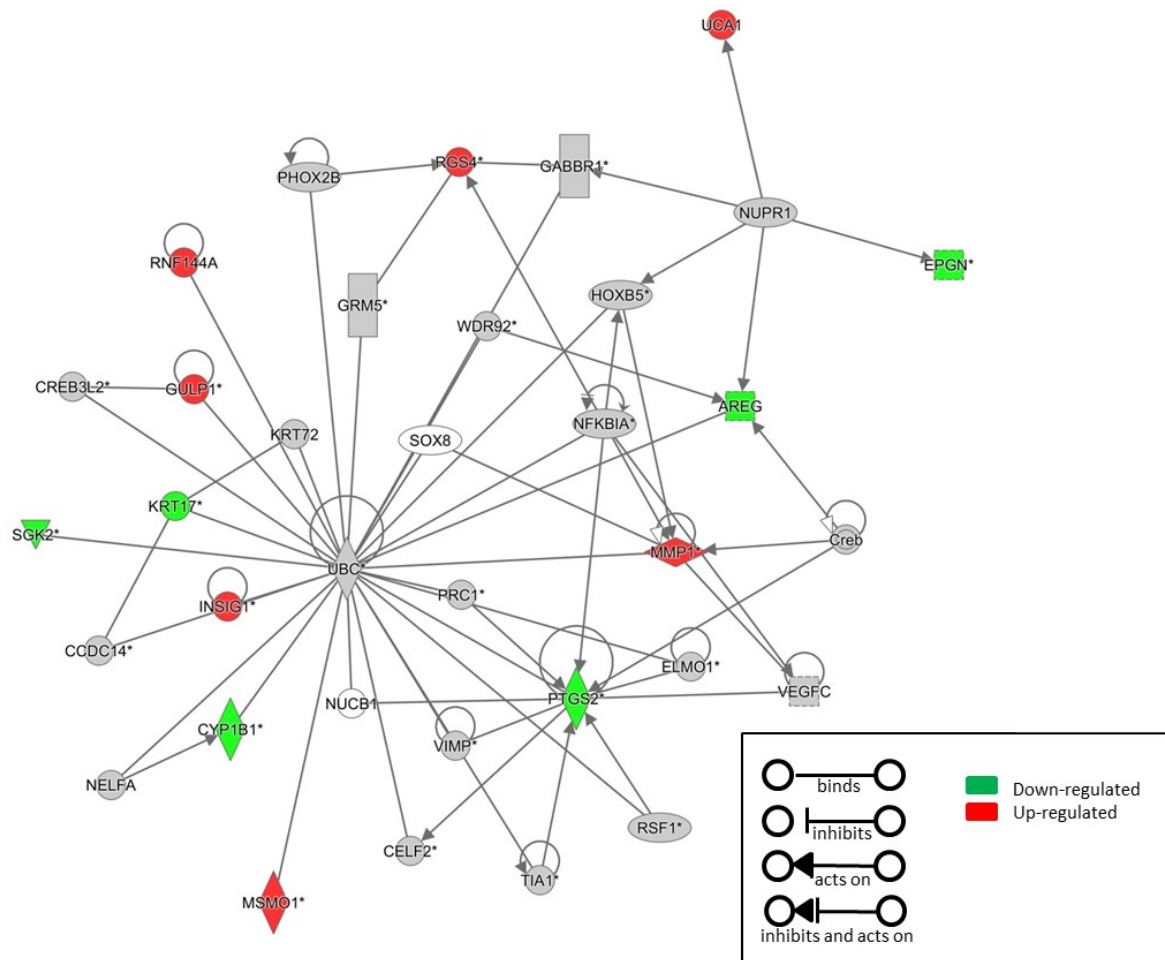

**Supplementary Figure 2.** A biological network of genes related to cancer following the treatment of PC3 cells with SN30028 (24-hour). The network was generated using the Ingenuity Pathway Analysis software. Genes represented by a red node were up-regulated and those represented by a green node were down-regulated. Increasing colour intensity represents increasing differential gene expression. The nodes with an asterisk at the right of the name of the gene indicate that the gene is represented by more than one probe in the array.

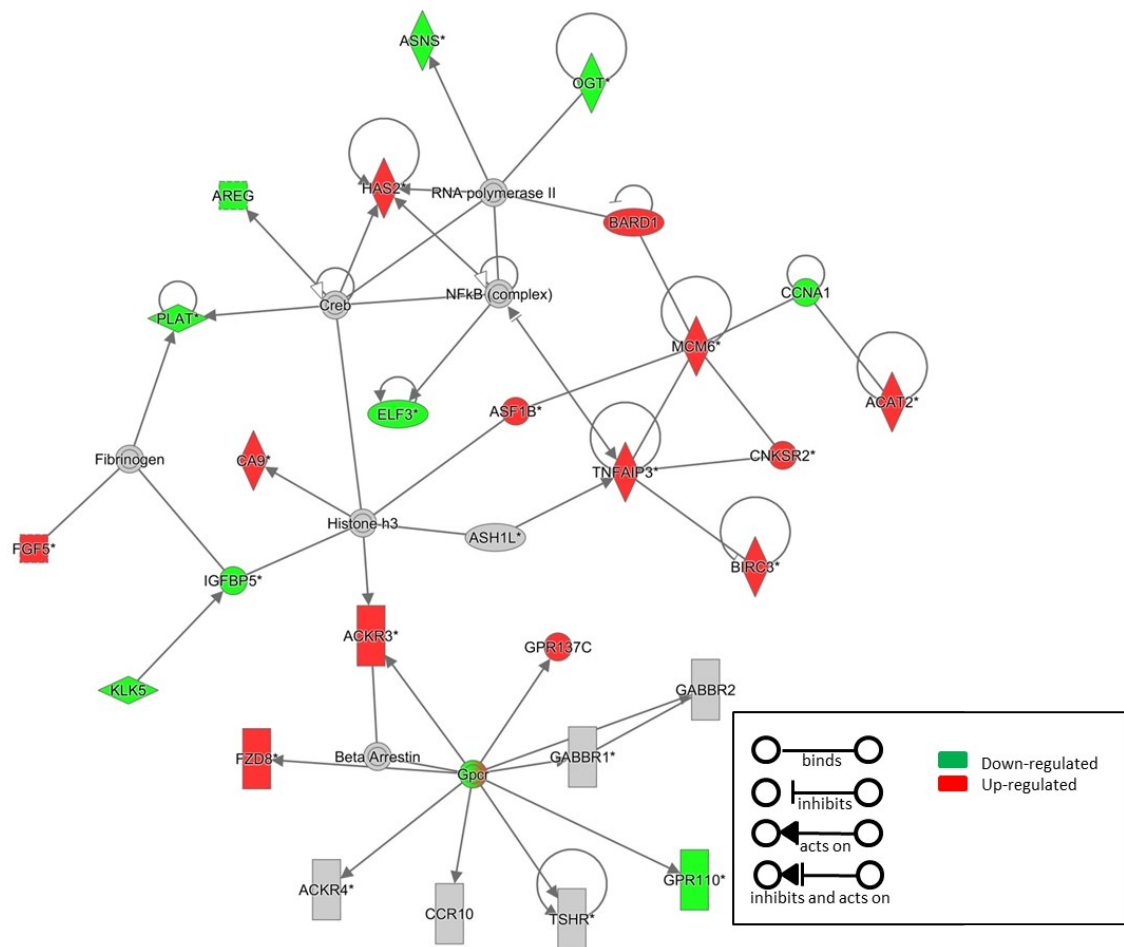

**Supplementary Figure 3.** A biological network of genes related to cancer following the treatment of PC3 cells with SN30028 (96-hour). The network was generated using the Ingenuity Pathway Analysis software. Genes represented by a red node were up-regulated and those represented by a green node were down-regulated. Increasing colour intensity represents increasing differential gene expression. The nodes with an asterisk at the right of the name of the gene indicate that the gene is represented by more than one probe in the array.

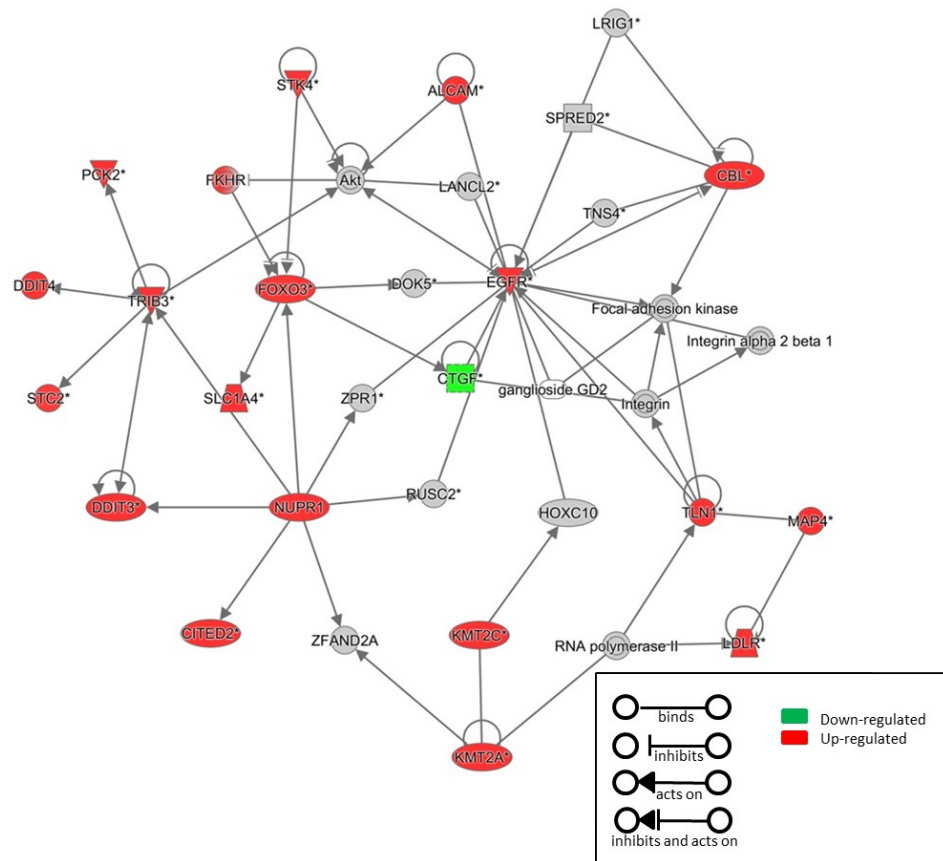

**Supplementary Figure 4.** A biological network of genes related to cancer following the treatment of DU145 cells with SN30028 (4-hour). The network was generated using the Ingenuity Pathway Analysis software. Genes represented by a red node were up-regulated and those represented by a green node were down-regulated. Increasing colour intensity represents increasing differential gene expression. The nodes with an asterisk at the right of the name of the gene indicate that the gene is represented by more than one probe in the array.



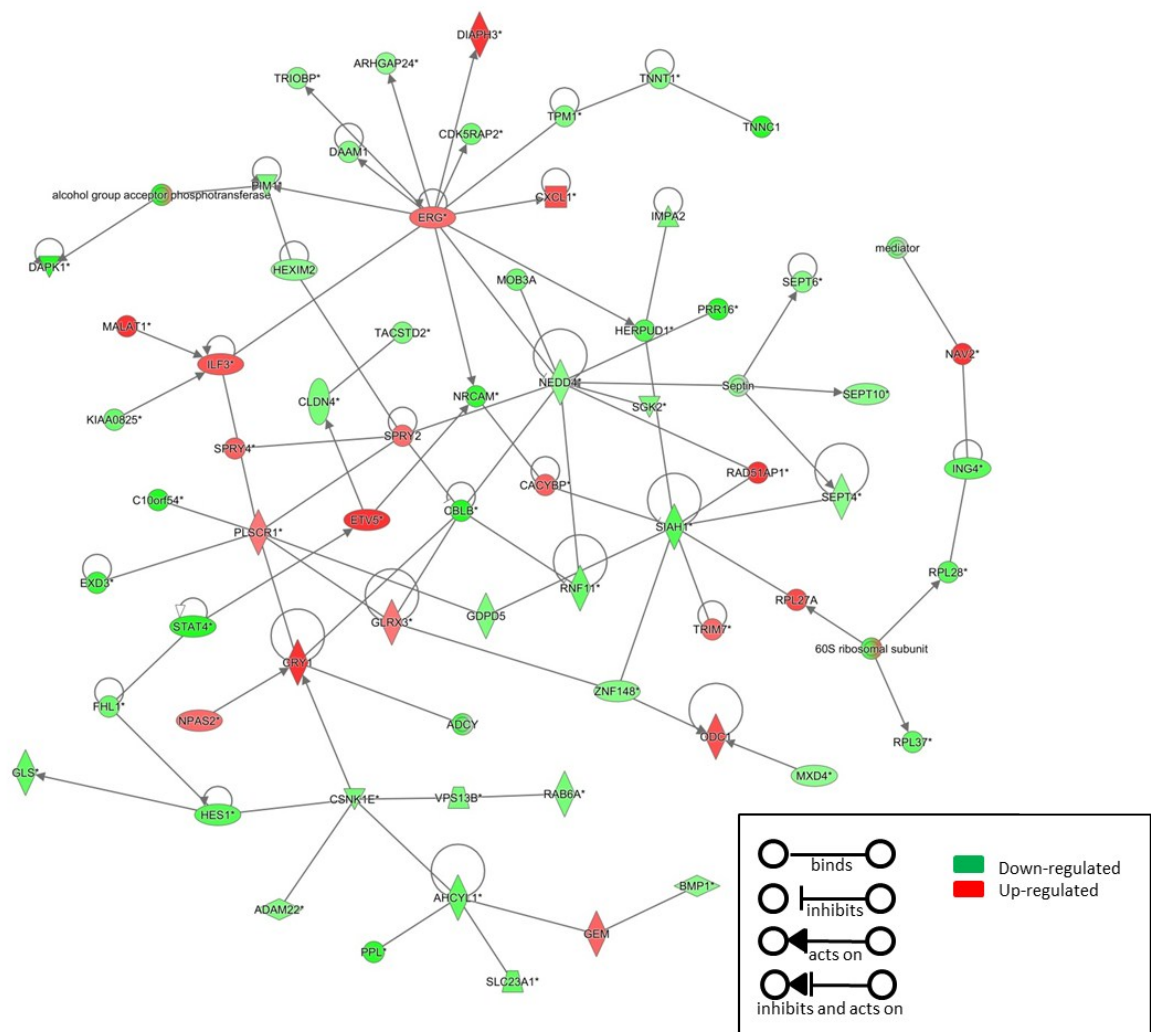

**Supplementary Figure 6.** A biological network of genes related to cancer following the treatment of DU145 cells with SN30028 (96-hour). The network was generated using the Ingenuity Pathway Analysis software. Genes represented by a red node were up-regulated and those represented by a green node were down-regulated. Increasing colour intensity represents increasing differential gene expression. The nodes with an asterisk at the right of the name of the gene indicate that the gene is represented by more than one probe in the array.
