# Supplementary material for: A quinazoline-based HDAC inhibitor affects gene expression pathways involved in cholesterol biosynthesis and mevalonate in prostate cancer cells
Source: Royal Society of Chemistry journal article supplement (doi:10.1039/c5mb00554j), 2016-01-06
Supplement: c5mb00554j2.pdf [file c5mb00554j2.pdf]

Supplementary Table 1. A comparison between differential gene expression as represented by fold change calculated from Affymetrix microarray and qRT-PCR experiments

| <b>Cell line and time</b> | <b>Gene symbol</b> | <b>qRT-PCR (fold change)</b> | <b>Microarray (fold change)</b> |
|---------------------------|--------------------|------------------------------|---------------------------------|
| <b>PC3 cell</b>           | <i>CYP1B1</i>      | -3.33                        | -2.03                           |
| <b>4 hours</b>            | <i>DUSP10</i>      | 3.32                         | 1.65                            |
|                           | <i>MMP1</i>        | 1.22                         | 1.63                            |
|                           | <i>MMP3</i>        | 2.84                         | 2.25                            |
|                           | <i>PTGS2</i>       | -1.67                        | -1.71                           |
| <b>PC3 cell</b>           | <i>AREG</i>        | -2.33                        | -1.87                           |
| <b>24 hours</b>           | <i>CYP1B1</i>      | -1.35                        | -2.07                           |
|                           | <i>EPGN</i>        | -2.08                        | -2.26                           |
|                           | <i>GULP1</i>       | 1.81                         | 1.83                            |
|                           | <i>INSIG1</i>      | 2.23                         | 1.53                            |
|                           | <i>KRT17</i>       | -1.56                        | -1.71                           |
|                           | <i>MMP1</i>        | 1.89                         | 1.66                            |
|                           | <i>PTGS2</i>       | -2.17                        | -2.47                           |
|                           | <i>RGS4</i>        | 1.99                         | 1.98                            |
|                           | <i>SGK2</i>        | -2.08                        | -1.76                           |
| <b>DU145 cell</b>         | <i>EGFR</i>        | 2.34                         | 1.94                            |
| <b>4 hours</b>            | <i>HMGCS1</i>      | 3.86                         | 2.17                            |
|                           | <i>INSIG1</i>      | 4.24                         | 2.74                            |
|                           | <i>LDLR</i>        | 2.12                         | 1.86                            |
|                           | <i>SQLE</i>        | 1.89                         | 1.88                            |
| <b>DU145 cell</b>         | <i>ARID5B</i>      | -1.43                        | 1.82                            |
| <b>24 hours</b>           | <i>CDKN2B</i>      | 1.38                         | 1.59                            |
|                           | <i>CYP51A1</i>     | 3.14                         | 2.30                            |
|                           | <i>DHCR7</i>       | 3.02                         | 2.25                            |
|                           | <i>HMGCR</i>       | 3.04                         | 1.92                            |
|                           | <i>HMGCS1</i>      | 5.11                         | 3.02                            |
|                           | <i>ID11</i>        | 1.77                         | 2.32                            |
|                           | <i>IFIT2</i>       | 4.60                         | 3.09                            |
|                           | <i>INSIG1</i>      | 3.92                         | 2.89                            |
|                           | <i>NR4A3</i>       | 2.13                         | 2.00                            |
|                           | <i>SCD</i>         | 4.76                         | 1.96                            |
|                           | <i>SQLE</i>        | 2.71                         | 2.12                            |
|                           | <i>TM7SF2</i>      | 4.74                         | 2.17                            |
|                           | <i>TP53INP1</i>    | 2.65                         | 2.36                            |
