# Supplementary material for: A quinazoline-based HDAC inhibitor affects gene expression pathways involved in cholesterol biosynthesis and mevalonate in prostate cancer cells
Source: Royal Society of Chemistry journal article supplement (doi:10.1039/c5mb00554j), 2016-01-06
Supplement: c5mb00554j3.pdf [file c5mb00554j3.pdf]

Supplementary Table 2. A list of modulated biological processes generated by GATHER software following analysis of differential gene expression results from PC3 and DU145 treated with SN30028 for 4, 24 and 96 hours.

| <b>Cell lines Times</b> | <b>Biological process</b>                                   | <b>Bayes factor</b> | <b>Differentially expressed genes</b>                              |
|-------------------------|-------------------------------------------------------------|---------------------|--------------------------------------------------------------------|
| PC3<br>4-hour           | Transforming growth factor beta receptor signalling pathway | 3.53                | BMPR1B, GDF15, HIPK2.                                              |
|                         | Eye morphogenesis                                           | 3.11                | BMPR1B, CYP1B1.                                                    |
| PC3<br>24-hour          | Cyclooxygenase pathway                                      | 4.72                | PTGS2.                                                             |
|                         | Arachidonic acid metabolism                                 | 3.62                | PTGS2.                                                             |
|                         | Phagocytosis, engulfment                                    | 3.34                | GULP1.                                                             |
|                         | Eye morphogenesis                                           | 3.11                | CYP1B1.                                                            |
|                         | Embryonic eye morphogenesis                                 | 3.11                | CYP1B1.                                                            |
|                         | Eye morphogenesis                                           | 3.11                | CYP1B1.                                                            |
| PC3<br>96-hour          | Response to nutrients                                       | 5.69                | OGT, STC1, STC2.                                                   |
|                         | Response to extracellular stimulus                          | 4.73                | OGT, STC1, STC2.                                                   |
|                         | Epidermis development                                       | 3.80                | ELF3, KLK5, KRT15, SCLE.                                           |
|                         | Nucleobase-containing compound metabolic process            | 3.80                | DDIT3, ELF3, KLF11, MCM6, TNFAIP3.                                 |
|                         | Ectoderm development                                        | 3.30                | ELF3, KLK5, KRT15, SCLE.                                           |
| DU145<br>4-hour         | Sterol biosynthesis                                         | 29.66               | DHCR7, HMGCR, HMGCS1, MVK, NSDHL, SC4MOL, SC5DL, SQLE.             |
|                         | Sterol metabolism                                           | 26.51               | DHCR7, HMGCR, HMGCS1, LDLR, MVK, NSDHL, SC4MOL, SC5DL, SQLE.       |
|                         | Steroid biosynthesis                                        | 22.06               | DHCR7, HMGCR, HMGCS1, MVK, NSDHL, SC4MOL, SC5DL, SQLE.             |
|                         | Steroid metabolism                                          | 19.58               | DHCR7, HMGCR, HMGCS1, LDLR, MVK, NSDHL, SC4MOL, SC5DL, SQLE.       |
|                         | Alcohol metabolism                                          | 17.91               | DHCR7, HMGCR, HMGCS1, LDLR, MVK, NSDHL, PCK2, SC4MOL, SC5DL, SQLE. |
|                         | Cholesterol biosynthesis                                    | 15.70               | DHCR7, HMGCR, HMGCS1, MVK, NSDHL.                                  |
|                         | Lipid biosynthesis                                          | 15.64               | DHCR7, HMGCR, HMGCS1, MVK, NSDHL, SC4MOL, SC5DL, SCD, SQLE.        |
|                         | Cholesterol metabolism                                      | 14.65               | DHCR7, HMGCR, HMGCS1, LDLR, MVK, NSDHL.                            |
|                         | Cellular lipid metabolism                                   | 11.59               | DHCR7, HMGCR, HMGCS1, LDLR, MVK, NSDHL, SC4MOL, SC5DL, SCD, SQLE.  |

|                  |                           |       |                                                                                                                                                                                         |
|------------------|---------------------------|-------|-----------------------------------------------------------------------------------------------------------------------------------------------------------------------------------------|
|                  | Lipid metabolism          | 9.30  | DHCR7, HMGCR, HMGCS1, LDLR, MVK, NSDHL, SC4MOL, SC5DL, SCD, SQLE.                                                                                                                       |
| DU145<br>24-hour | Sterol biosynthesis       | 51.26 | CYP51A1, DHCR7, EBP, FDFT1, FDPS, HMGCR, HMGCS1, IDI1, MVK, NSDHL, SC4MOL, SC5DL, SQLE, TM7SF2.                                                                                         |
|                  | Steroid metabolism        | 49.75 | AKR1C2, APOL1, APOL2, CYP51A1, DHCR7, EBP, FDFT1, FDPS, HMGCR, HMGCS1, HSD17B7, IDI1, LDLR, LSS, MVK, NSDHL, SC4MOL, SC5DL, SQLE, STARD4, TM7SF2.                                       |
|                  | Sterol metabolism         | 49.31 | APOL1, APOL2, CYP51A1, DHCR7, EBP, FDFT1, FDPS, HMGCR, HMGCS1, IDI1, LDLR, MVK, NSDHL, SC4MOL, SC5DL, SQLE, TM7SF2.                                                                     |
|                  | Steroid biosynthesis      | 48.99 | CYP51A1, DHCR7, EBP, FDFT1, FDPS, HMGCR, HMGCS1, HSD17B7, IDI1, LSS, MVK, NSDHL, SC4MOL, SC5DL, SQLE, STARD4, TM7SF2.                                                                   |
|                  | Lipid biosynthesis        | 40.15 | CYP51A1, DHCR7, EBP, FADS1, FADS2, FDFT1, FDPS, GNE, HMGCR, HMGCS1, HSD17B7, IDI1, LSS, MVK, NSDHL, SC4MOL, SC5DL, SCD, SQLE, STARD4, TM7SF2.                                           |
|                  | Cholesterol biosynthesis  | 38.29 | CYP51A1, DHCR7, EBP, FDFT1, FDPS, HMGCR, HMGCS1, IDI1, MVK, NSDHL, TM7SF2.                                                                                                              |
|                  | Cholesterol metabolism    | 38.12 | APOL1, APOL2, CYP51A1, DHCR7, EBP, FDFT1, FDPS, HMGCR, HMGCS1, IDI1, LDLR, MVK, NSDHL, TM7SF2.                                                                                          |
|                  | Cellular lipid metabolism | 37.28 | AKR1C2, AKR1C3, APOL1, APOL2, CYP51A1, DHCR7, EBP, FADS1, FADS2, FDFT1, FDPS, GNE, HMGCR, HMGCS1, HSD17B7, IDI1, LDLR, LSS, MVK, NSDHL, SC4MOL, SC5DL, SCD, SQLE, STARD4, TM7SF2.       |
|                  | Alcohol metabolism        | 35.20 | APOL1, APOL2, CYP51A1, DHCR7, EBP, FDFT1, FDPS, HK2, HMGCR, HMGCS1, IDI1, LDLR, MVK, NSDHL, PFKFB2, PFKFB3, SC4MOL, SC5DL, SQLE, TM7SF2.                                                |
|                  | Lipid metabolism          | 33.48 | AKR1C2, AKR1C3, APOL1, APOL2, CYP51A1, DHCR7, EBP, FADS1, FADS2, FDFT1, FDPS, GNE, HMGCR, HMGCS1, HSD17B7, IDI1, LDLR, LIPG, LSS, MVK, NSDHL, SC4MOL, SC5DL, SCD, SQLE, STARD4, TM7SF2. |

|                  |                                      |       |                                                                                                                                                                                                                                                                                                                                                                                                                                                                                                                                                                                                                                                                                                                                                                                                                                                                                       |
|------------------|--------------------------------------|-------|---------------------------------------------------------------------------------------------------------------------------------------------------------------------------------------------------------------------------------------------------------------------------------------------------------------------------------------------------------------------------------------------------------------------------------------------------------------------------------------------------------------------------------------------------------------------------------------------------------------------------------------------------------------------------------------------------------------------------------------------------------------------------------------------------------------------------------------------------------------------------------------|
|                  | Isoprenoid biosynthesis              | 10.51 | FDFT1, FDPS, IDI1, MVK.                                                                                                                                                                                                                                                                                                                                                                                                                                                                                                                                                                                                                                                                                                                                                                                                                                                               |
|                  | Isoprenoid metabolism                | 9.31  | FDFT1, FDPS, IDI1, MVK.                                                                                                                                                                                                                                                                                                                                                                                                                                                                                                                                                                                                                                                                                                                                                                                                                                                               |
|                  | Fructose 2,6-bisphosphate metabolism | 3.91  | PFKFB2, PFKFB3.                                                                                                                                                                                                                                                                                                                                                                                                                                                                                                                                                                                                                                                                                                                                                                                                                                                                       |
|                  | Coenzyme A biosynthesis              | 3.40  | PANK1, PANK3.                                                                                                                                                                                                                                                                                                                                                                                                                                                                                                                                                                                                                                                                                                                                                                                                                                                                         |
|                  | Fatty acid desaturation              | 3.40  | FADS1, FADS2.                                                                                                                                                                                                                                                                                                                                                                                                                                                                                                                                                                                                                                                                                                                                                                                                                                                                         |
|                  | Lipid transport                      | 3.13  | APOL1, APOL2, LDLR, STARD4.                                                                                                                                                                                                                                                                                                                                                                                                                                                                                                                                                                                                                                                                                                                                                                                                                                                           |
|                  | Coenzyme A metabolism                | 3.01  | PANK1, PANK3.                                                                                                                                                                                                                                                                                                                                                                                                                                                                                                                                                                                                                                                                                                                                                                                                                                                                         |
| DU145<br>96-hour | Cell proliferation                   | 25.21 | AKR1C3, APBB2, ATF5, AURKB, BIRC5, BLM, BRCA1, BRCA2, CABLES1, CCNA1, CCND1, CCNE2, CCNG2, CDC2, CDC25A, CDC25B, CDC27, CDC45L, CDC6, CDCA5, CDKN1B, CDKN1C, CDKN2B, CDKN3, CDT1, CENPF, CHAF1A, CHEK2, CKLF, CLK1, CRIP1, CSPG6, CXCL1, DAB2, DDIT3, DLEU2, DST, DUSP4, DUSP6, E2F1, E2F2, E2F5, E2F7, EDG3, EDN1, EGF, EMP1, ENPEP, ERBB2IP, ERG, ETS1, EXO1, FEN1, FGB, FOSL1, G0S2, GPNMB, HDAC4, HDAC9, HERC5, HIPK2, HMGA1, IGF1R, IGFBP6, IL11, IL15, IL8, ILF3, ING4, IRS2, KIF23, KITLG, KRAS, LRP5, LTBP2, MAD2L1, MCM2, MCM3, MCM4, MCM8, MKI67, MXD4, MYH10, NCK1, NF1, NFIB, NRP1, ORC1L, ORC6L, OSMR, PA2G4, PARD3, PCNA, PDGFA, PKMYT1, PLAGL1, PLCB1, POLA2, POLD4, POLQ, PPP1CB, PRKCA, RAD50, RAD51, RARRES1, RBM14, RECK, RFC3, RFC5, RFP2, RGS2, RRM1, RRM2, SASH1, SEPT10, SEPT4, SEPT6, SESN2, SESN3, SHC1, SIAH1, TACSTD2, TGFBI, TNFSF7, TOP1, TSPAN1, UHRF1. |
|                  | Cell cycle                           | 21.49 | APBB2, ATF5, AURKB, BIRC5, BLM, BRCA1, BRCA2, CABLES1, CCNA1, CCND1, CCNE2, CCNG2, CDC2, CDC25A, CDC25B, CDC27, CDC45L, CDC6, CDKN1B, CDKN1C, CDKN2B, CDKN3, CDT1, CENPF, CHAF1A, CHEK2, CLK1, CSPG6, DDIT3, DLEU2, DST, DUSP4, DUSP6, E2F1, E2F2, E2F5, E2F7, EGF, ERBB2IP, EXO1, FEN1, G0S2, HDAC4, HDAC9, HERC5, HIPK2, HMGA1, IGF1R, IL8, ILF3, ING4, KIF23, KRAS, LTBP2,                                                                                                                                                                                                                                                                                                                                                                                                                                                                                                         |

|                            |       |                                                                                                                                                                                                                                                                                                                                                                                                                                             |
|----------------------------|-------|---------------------------------------------------------------------------------------------------------------------------------------------------------------------------------------------------------------------------------------------------------------------------------------------------------------------------------------------------------------------------------------------------------------------------------------------|
|                            |       | MAD2L1, MCM2, MCM3, MCM4, MCM8, MKI67, NF1, NFIB, ORC1L, ORC6L, PA2G4, PARD3, PCNA, PDGFA, PKMYT1, PLAGL1, PLCB1, POLA2, POLD4, POLQ, PRKCA, RAD50, RAD51, RBM14, RECK, RFC3, RFC5, RFP2, RGS2, RRM1, RRM2, SASH1, SEPT10, SEPT4, SEPT6, SESN2, SESN3, SHC1, SIAH1, TOP1.                                                                                                                                                                   |
| Regulation of cell cycle   | 13.68 | APBB2, ATF5, BRCA1, BRCA2, CCNA1, CCND1, CCNE2, CCNG2, CDC2, CDC25A, CDC25B, CDC45L, CDC6, CDKN1B, CDKN1C, CDKN2B, CDKN3, CDT1, CENPF, CHEK2, CLK1, DDIT3, DLEU2, DST, DUSP4, DUSP6, E2F1, E2F2, E2F5, E2F7, G0S2, HDAC9, HERC5, HIPK2, IGF1R, IL8, ING4, KRAS, LTBP2, MAD2L1, MKI67, NF1, PA2G4, PCNA, PDGFA, PKMYT1, PLAGL1, PLCB1, PRKCA, RECK, RFP2, SASH1, SESN2, SESN3, SHC1.                                                         |
| DNA replication            | 10.21 | BLM, CDC45L, CDC6, CDT1, CHAF1A, EGF, EXO1, FEN1, HMGA1, MCM2, MCM3, MCM4, MCM8, NFIB, ORC1L, ORC6L, PCNA, POLA2, POLD4, POLQ, RAD51, RBM14, RFC3, RFC5, RRM1, RRM2, TOP1.                                                                                                                                                                                                                                                                  |
| Neurophysiological process | 9.24  | ABAT, ALDH7A1, ATRX, CDH3, CDS1, CHRN1, CRY1, CYP1B1, DHRS3, GCH1, OPRL1, PCDHB10, PCLO, SRI, SULT1A3, TACSTD2, TBL1X, TGFBI.                                                                                                                                                                                                                                                                                                               |
| DNA metabolism             | 9.22  | ARID4A, ATRX, BLM, BRCA1, BRCA2, CDC45L, CDC6, CDT1, CHAF1A, CHD2, CHD4, CRY1, CSNK1E, CSPG6, DNMT1, EGF, EXO1, FEN1, GADD45G, GLRX2, H2AFV, H2AFX, HDAC4, HDAC9, HIST1H1C, HIST1H2AC, HIST1H2BD, HIST2H2BE, HMGA1, HMGA2, IFIH1, MCM2, MCM3, MCM4, MCM8, NAV1, NFIB, NP, NT5E, ORC1L, ORC6L, PCGF4, PCNA, POLA2, POLD4, POLQ, PRKDC, RAD50, RAD51, RAD51AP1, RAD51C, RBM14, RECQL, RFC3, RFC5, RRM1, RRM2, SHPRH, SLK, TOP1, TOP2A, WDR33. |

|                                                                         |      |                                                                                                                                                                                                                           |
|-------------------------------------------------------------------------|------|---------------------------------------------------------------------------------------------------------------------------------------------------------------------------------------------------------------------------|
| DNA replication and chromosome cycle                                    | 7.44 | BLM, CDC45L, CDC6, CDT1, CENPF, CHAF1A, CSPG6, EGF, EXO1, FEN1, HMGA1, MCM2, MCM3, MCM4, MCM8, NFIB, ORC1L, ORC6L, PCNA, POLA2, POLD4, POLQ, RAD51, RBM14, RFC3, RFC5, RRM1, RRM2, TOP1.                                  |
| Sensory perception                                                      | 6.54 | ALDH7A1, ATRX, CDH3, CDS1, CRY1, CYP1B1, DHRS3, OPRL1, TACSTD2, TBL1X, TGFBI.                                                                                                                                             |
| G-protein coupled receptor signalling pathway                           | 5.71 | AKAP12, C3, C6orf33, CALCR, CELSR1, CPE, CXCL1, CXCL2, EDG3, EDG8, ENPP2, FZD7, FZD8, GAL, GNAL, GNB4, GNG7, GPR126, GPR39, GPR64, IL8, NMU, OPRL1, OXTR, P2RY6, PARD3, RGS2, SPHK1, WDR5B, XPR1.                         |
| Detection of external stimulus                                          | 5.67 | ALDH7A1, ATRX, CDH3, CDS1, CRY1, CYP1B1, DHRS3, HLA, DMA, OPRL1, PLEKHB1, TACSTD2, TBL1X, TGFBI.                                                                                                                          |
| G2/M transition of mitotic cell cycle                                   | 3.46 | BIRC5, CCNA1, CCNE2, CDC25A, CDC6, CDKN1B, CDKN1C, CDKN2B, CDKN3, HERC5, PKMYT1.                                                                                                                                          |
| Amino acid and derivative metabolism                                    | 3.34 | AARS, ABAT, AGMAT, ALDH4A1, ALDH6A1, ARG2, ASMTL, ASNS, ASS, AUH, CBS, CORO2A, CTH, DDAH2, DHFR, ETNK1, GCH1, GCLC, GFPT2, GLS, HIBADH, MTRR, ODC1, PCYOX1, PROSC, PSAT1, SCLY, SLC7A5, SULT1A1, SULT1A2, SULT1A3, TPST2. |
| Regulation of cyclin-dependent protein serine/threonine kinase activity | 3.31 | CCNA1, CCNE2, CDC25A, CDC6, CDKN1B, CDKN1C, CDKN2B, CDKN3, HERC5, PKMYT1.                                                                                                                                                 |
| Glutamine family amino acid metabolism                                  | 3.31 | AGMAT, ALDH4A1, ARG2, ASNS, ASS, CORO2A, DDAH2, GCLC, GFPT2, GLS.                                                                                                                                                         |
| Amine biosynthesis                                                      | 3.20 | AGMAT, ALDH4A1, ASMTL, ASNS, ASS, CBS, CORO2A, CTH, DHFR, ETNK1, MTRR, ODC1, PSAT1, SULT1A2.                                                                                                                              |

---
